# Supplementary material
Source: MDPI journal article supplement (https://www.mdpi.com/2077-0472/13/9/1739)
Supplement: s1 [file s1]

## Supplementary Materials

**Table S1. Classification standard for soil fertility**

| Index                              | Different levels |           |       |
|------------------------------------|------------------|-----------|-------|
|                                    | I                | II        | III   |
| pH value                           | 5.0 ~ 5.5        | 4.5 ~ 5.0 | < 4.5 |
| Organic matter content (g/kg)      | > 15             | 10 ~ 15   | < 10  |
| Cation Exchange Capacity (mmol/kg) | > 20             | 15 ~ 20   | < 15  |
| Total nitrogen (g/kg)              | > 1.0            | 0.8 ~ 1.0 | < 0.8 |
| Total phosphorus (g/kg)            | > 0.6            | 0.4 ~ 0.6 | < 0.4 |
| Total potassium (g/kg)             | > 10             | 5 ~ 10    | < 5   |
| Available nitrogen (mg/kg)         | > 100            | 50 ~ 100  | < 50  |
| Available phosphorus (mg/kg)       | > 10             | 5 ~ 10    | < 5   |
| Available potassium (mg/kg)        | > 120            | 80 ~ 120  | < 80  |

Note: I: The soil has good fertility; II: Soil fertility is moderate; III: The soil fertility is poor;

### Reference:

1. Ministry of Agriculture and Rural Affairs of the People's Republic of China. NY/T 853-2004 Environmental requirement for growing area of tea [M]. China Standards Press, Beijing. **2015**, pp. 1–7
2. Mehra, A.; Baker, C.L. Leaching and bioavailability of aluminium, copper and manganese from tea (*Camellia sinensis*). *Food Chem.* **2017**, *100*, 1456–1463. <https://doi.org/10.1016/j.foodchem.2005.11.038>.
3. Mohammad, N.; Samar, M.; Alireza, I. Levels of Cu, Zn, Pb and Cd in the leaves of the tea plant (*Camellia sinensis*) and in the soil of Gilan and Mazandaran farms of Iran. *Food Meas.* **2014**, *8*, 277–282. <https://doi.org/10.1007/s11694-014-9186-3>.

**Table S2. Aroma threshold and odor characteristics of some aroma compounds**

| Compound                                       | Threshold value*<br>µg/kg | Splits of odor characteristic (%)** |        |       |       |        |       |
|------------------------------------------------|---------------------------|-------------------------------------|--------|-------|-------|--------|-------|
|                                                |                           | Woody                               | Floral | Burnt | Green | Fruity | Fatty |
| 1-Octen-3-ol                                   | 0.04                      | 0                                   | 0      | 80    | 10    | 0      | 10    |
| 3,5-Octadien-2-one                             | 0.15                      | 0                                   | 0      | 100   | 0     | 0      | 0     |
| D-Limonene                                     | 0.038                     | 10                                  | 0      | 0     | 20    | 70     | 0     |
| α-Ionone                                       | 0.007                     | 15                                  | 85     | 0     | 0     | 0      | 0     |
| β-Cyclocitral                                  | 0.003                     | 10                                  | 0      | 0     | 20    | 70     | 0     |
| β- Ionone                                      | 0.0075                    | 50                                  | 30     | 20    | 0     | 0      | 0     |
| Benzaldehyde                                   | 3.5                       | 5                                   | 0      | 0     | 10    | 75     | 10    |
| trans-Nerolidol                                | 0.015                     | 0                                   | 85     | 0     | 15    | 0      | 0     |
| Benzaldehyde, 4-methyl-                        | 3.5                       | 5                                   | 0      | 0     | 10    | 75     | 10    |
| trans-Nerolidol                                | 0.015                     | 0                                   | 85     | 0     | 15    | 0      | 0     |
| Linalool                                       | 0.5                       | 0                                   | 100    | 0     | 0     | 0      | 0     |
| 2,4-Heptadienal, (E,E)-                        | 0.49                      | 0                                   | 0      | 0     | 0     | 0      | 100   |
| Furfural                                       | 0.282                     | 0                                   | 0      | 80    | 0     | 0      | 20    |
| Citral                                         | 0.032                     | 10                                  | 0      | 0     | 20    | 70     | 0     |
| Methyl salicylate                              | 0.04                      | 0                                   | 70     | 30    | 0     | 0      | 0     |
| 2-Penten-1-ol, (Z)-                            | 0.4                       | 0                                   | 0      | 0     | 100   | 0      | 0     |
| Geranylacetone                                 | 0.186                     | 0                                   | 90     | 0     | 0     | 0      | 10    |
| Geraniol                                       | 0.0032                    | 0                                   | 100    | 0     | 0     | 0      | 0     |
| Myrcene                                        | 13                        | 50                                  | 20     |       |       | 30     |       |
| Ionone oxide                                   | 0.007                     | 50                                  | 30     | 20    | 0     | 0      | 0     |
| s-Triazolo[1,5-a]pyridine,<br>2,5,7-trimethyl- | 0.282                     | 0                                   | 0      | 80    | 0     | 0      | 20    |

\* Threshold Values were referred to Van et al (1,2).

\*\* Splits of odor characteristics were referred to Lin (3).

1. Van, G.L.J. Compilations of flavor threshold values in water and other media; Boelens Aroma Chemical Information Services: Houten, The Netherlands. 2003.
2. Van, G.L.J. Compilations of odour threshold values in air, water and other media; Second enlarged and revised edition; Boelens Aroma Chemical Information Services: Houten, The Netherlands. 2011.
3. Lin, X.Y. Perfumery, 3rd ed.; Chemical Industry Press: Beijing, China. 2018.

**Table S3. GC-MS analysis of volatile compounds in tea leaves planted in soils with different pH**

| <b>Compound</b>                                                      | <b>pH 5.32</b><br>(µg/kg) | <b>pH 4.74</b><br>(µg/kg) | <b>pH 4.13</b><br>(µg/kg) | <b>pH 3.29</b><br>(µg/kg) |
|----------------------------------------------------------------------|---------------------------|---------------------------|---------------------------|---------------------------|
| <b>Terpenoids</b>                                                    |                           |                           |                           |                           |
| 1,3-Cyclohexadiene, 1,5,5,6-tetramethyl-                             | 0.173±0.023               | 0                         | 0                         | 0                         |
| 2,6-Dimethyl-2-trans-6-octadiene                                     | 1.094±0.145               | 0.450±0.029               | 0.062±0.008               | 0                         |
| Cyclopropanecarboxylic acid,<br>2,7-dimethyloct-7-en-5-yn-4-yl ester | 0.255±0.031               | 0.125±0.038               | 0                         | 0                         |
| Allo-Ocimene                                                         | 1.381±0.164               | 0.343±0.029               | 0.088±0.011               | 0                         |
| D-Limonene                                                           | 0.731±0.051               | 1.295±0.053               | 0.118±0.024               | 0.432±0.021               |
| α-Bulnesene                                                          | 0.040±0.008               | 0.040±0.009               | 0.096±0.009               | 0                         |
| α-Terpinene                                                          | 0.186±0.014               | 0.246±0.035               | 0                         | 0                         |
| α-Terpinolene                                                        | 0.468±0.025               | 0.330±0.027               | 0.629±0.042               | 0                         |
| α-Ionone                                                             | 2.184±0.122               | 1.862±0.091               | 1.592±0.085               | 1.197±0.136               |
| β-Cyclocitral                                                        | 0.595±0.082               | 0.522±0.052               | 0.206±0.023               | 0.444±0.038               |
| β- Ionone                                                            | 3.092±0.161               | 2.202±0.114               | 2.149±0.112               | 1.242±0.137               |
| β-Ionon-5,6-epoxide                                                  | 0.126±0.022               | 0.177±0.026               | 0.377±0.013               | 0.168±0.023               |
| γ-Terpinene                                                          | 0.262±0.018               | 0.123±0.035               | 0                         | 0                         |
| Menthallactone                                                       | 0.098±0.019               | 0.068±0.012               | 0                         | 0.068±0.018               |
| 4-Oxoisophorone                                                      | 0                         | 0                         | 0                         | 0.178±0.014               |
| trans-Nerolidol                                                      | 0.045±0.011               | 0.043±0.012               | 0.046±0.014               | 0.117±0.017               |
| Dihydroactindiolide                                                  | 0.143±0.021               | 0.180±0.016               | 0.599±0.058               | 0.310±0.006               |
| (E)-ψ-Ionone                                                         | 0                         | 0.070±0.011               | 0.115±0.027               | 0.097±0.012               |
| Linalool                                                             | 11.251±0.462              | 8.448±0.281               | 5.390±0.293               | 2.480±0.205               |
| (E,E)-Farnesal                                                       | 0.048±0.009               | 0.055±0.011               | 0.083±0.010               | 0.034±0.006               |
| β-Ocimene                                                            | 0.873±0.017               | 0.560±0.041               | 0                         | 0                         |
| Ocimene mixture                                                      | 0                         | 0                         | 0                         | 0.090±0.013               |
| Citral                                                               | 0                         | 0                         | 0                         | 0.249±0.026               |
| Pinane, endo                                                         | 0.927±0.027               | 1.182±0.032               | 1.212±0.125               | 0.560±0.016               |
| α-Terpineol                                                          | 0.078±0.011               | 0                         | 0                         | 0.064±0.013               |
| Geraniol                                                             | 11.274±0.392              | 8.266±0.234               | 5.326±0.387               | 3.390±0.238               |
| Geranylacetone                                                       | 2.990±0.123               | 1.351±0.092               | 0.841±0.025               | 0.518±0.031               |
| Carvenone                                                            | 0.204±0.013               | 0.295±0.024               | 0.544±0.064               | 0.209±0.028               |
| Isophytol                                                            | 0.053±0.008               | 0.146±0.018               | 0.172±0.021               | 0.053±0.007               |
| Myrcene                                                              | 0.412±0.014               | 0.493±0.032               | 0                         | 0.116±0.013               |
| Phytol                                                               | 0.257±0.022               | 0.320±0.024               | 0.365±0.034               | 0.051±0.008               |
| Phytone                                                              | 0.176±0.016               | 0.261±0.018               | 0.536±0.037               | 0.065±0.010               |
| <b>Hydrocarbons</b>                                                  |                           |                           |                           |                           |
| o-Xylene                                                             | 1.661±0.158               | 1.830±0.084               | 0.573±0.024               | 0.253±0.014               |
| Naphthalene, 1,2,3,4-tetrahydro-1,6,8-trimethyl-                     | 0.320±0.013               | 0.290±0.021               | 0.123±0.016               | 0.136±0.019               |
| Benzene, 1,2,3,5-tetramethyl-                                        | 0.158±0.013               | 0.125±0.021               | 0                         | 0                         |
| Naphthalene, 1,2,3-trimethyl-4-propenyl-, (E)-                       | 0.029±0.007               | 0.054±0.009               | 0.071±0.011               | 0                         |
| Benzene, 1,2,4-trimethyl-                                            | 0                         | 0.402±0.023               | 0                         | 0.138±0.017               |
| Benzene, 2-(2-butenyl)-1,3,5-trimethyl-                              | 0.067±0.006               | 0                         | 0                         | 0                         |
| Naphthalene, 2,6-dimethyl-                                           | 0.252±0.011               | 0.184±0.015               | 0.341±0.034               | 0                         |

|                                                           |             |             |             |             |
|-----------------------------------------------------------|-------------|-------------|-------------|-------------|
| Benzene, 4-(2-butenyl)-1,2-dimethyl-, (E)-                | 0.168±0.012 | 0           | 0           | 0           |
| Benzaldehyde, 4-methyl-                                   | 0           | 0           | 0           | 0.130±0.08  |
| Paroxypropione                                            | 0           | 0           | 0           | 0.108±0.016 |
| p-Cymene                                                  | 1.230±0.021 | 0           | 0           | 0           |
| Benzene, 1-ethyl-4-methyl-                                | 0           | 0           | 0           | 0.148±0.012 |
| m-Cymene                                                  | 0           | 0.116±0.021 | 0           | 0           |
| o-Cymene                                                  | 0.387±0.018 | 0.544±0.018 | 0.209±0.025 | 0.324±0.018 |
| o-Isopropenyltoluene                                      | 0.317±0.013 | 0.198±0.022 | 0.080±0.007 | 0.138±0.012 |
| Benzaldehyde, 2-hydroxy-                                  | 0.246±0.012 | 0.137±0.019 | 0.143±0.012 | 0.041±0.008 |
| 1, 1, 5-Trimethyl-1, 2-dihydronaphthalene                 | 2.787±0.185 | 1.693±0.143 | 1.483±0.203 | 1.060±0.052 |
| <b>Heterocycles</b>                                       |             |             |             |             |
| 1H-Pyrrole, 1-ethyl-                                      | 1.136±0.124 | 0.411±0.036 | 0           | 0           |
| 1H-Pyrrole, 1-(2-furanylmethyl)-                          | 0.391±0.012 | 0.241±0.029 | 0           | 0           |
| trans-2-(2-Pentenyl)furan                                 | 0.102±0.011 | 0           | 0           | 0           |
| Benzofuran, 2,3-dihydro-                                  | 0.142±0.014 | 0.121±0.014 | 0.092±0.008 | 0           |
| 1H-Pyrrole-3-carboxylic acid, 2,4-dimethyl-, methyl ester | 0.201±0.013 | 0           | 0           | 0           |
| Pyrazine, 3,5-diethyl-2-methyl-                           | 0.131±0.009 | 0.107±0.017 | 0           | 0           |
| Furan, 2-ethyl-5-methyl-                                  | 0.312±0.015 | 0.240±0.024 | 0.129±0.014 | 0.106±0.014 |
| Ethanone, 1-(1H-pyrrol-2-yl)-                             | 0.399±0.016 | 0.418±0.013 | 0.399±0.013 | 0.230±0.016 |
| Ethanone, 1-(2-furanyl)-                                  | 0.587±0.018 | 0           | 0           | 0           |
| 2-n-Butyl furan                                           | 1.003±0.106 | 0           | 0           | 0           |
| Nicotinyl alcohol                                         | 0.067±0.008 | 0.077±0.012 | 0.063±0.006 | 0           |
| 1H-Indole, 3-methyl-                                      | 0.063±0.011 | 0.083±0.011 | 0.082±0.009 | 0           |
| 4,5-Diamino-6-hydroxypyrimidine                           | 0.130±0.014 | 0           | 0           | 0           |
| 2-Furancarboxaldehyde, 5-methyl-                          | 0.621±0.018 | 1.106±0.018 | 0.941±0.037 | 0.662±0.074 |
| 6-Quinazolinol                                            | 0           | 0.051±0.013 | 0.058±0.009 | 0           |
| 1H-Pyrrole-2-carboxaldehyde                               | 0.160±0.011 | 0.122±0.021 | 0.131±0.026 | 0.079±0.011 |
| 1H-Pyrrole-2-carboxaldehyde, 1-ethyl-                     | 2.167±0.157 | 2.170±0.014 | 1.539±0.218 | 1.099±0.068 |
| Indole                                                    | 0.050±0.009 | 0.099±0.011 | 0           | 0           |
| s-Triazolo[1,5-a]pyridine, 2,5,7-trimethyl-               | 0.166±0.012 | 0           | 0           | 0           |
| Carbazole, 2,5-dimethyl-                                  | 0           | 0.046±0.009 | 0.049±0.011 | 0           |
| <b>Alcohols</b>                                           |             |             |             |             |
| 2-Penten-1-ol, (Z)-                                       | 0           | 0.135±0.015 | 0           | 0.110±0.08  |
| 1-Octen-3-ol                                              | 0.151±0.024 | 0.644±0.046 | 0           | 0           |
| 2-Pentadecanol                                            | 0.373±0.013 | 0           | 0           | 0           |
| <b>Ketones</b>                                            |             |             |             |             |
| 5-Hepten-2-one, 6-methyl-                                 | 0.289±0.011 | 0.482±0.042 | 0.330±0.018 | 1.279±0.164 |
| 6,8-Nonadien-2-one, 6-methyl-5-(1-methylethylidene)-      | 0.408±0.014 | 0.315±0.039 | 0           | 0           |
| 3,5-Octadien-2-one                                        | 0           | 0           | 0           | 0.101±0.017 |
| 6-Methyl-3,5-heptadiene-2-one                             | 0           | 0.120±0.013 | 0           | 0.457±0.013 |
| 2-Cyclopenten-1-one, 2-methyl-                            | 0           | 0           | 0.062±0.016 | 0.065±0.009 |
| Ethanone, 1-(2-methylphenyl)-                             | 0.356±0.009 | 0.354±0.041 | 0.495±0.044 | 0.259±0.014 |
| <b>Aldehydes</b>                                          |             |             |             |             |

|                                                  |               |               |               |               |
|--------------------------------------------------|---------------|---------------|---------------|---------------|
| 5-Heptenal, 2,6-dimethyl-                        | 0.198±0.005   | 0.144±0.019   | 0.159±0.184   | 0             |
| Furfural                                         | 0.618±0.053   | 1.087±0.057   | 1.246±0.109   | 1.629±0.213   |
| 2,4-Heptadienal, (E,E)-                          | 0.105±0.008   | 0.176±0.016   | 0.085±0.011   | 0.268±0.038   |
| Benzaldehyde                                     | 0.371±0.011   | 0.678±0.024   | 0             | 1.137±0.217   |
| Benzaldehyde, 3-ethyl-                           | 0.060±0.010   | 0.086±0.011   | 0.210±0.017   | 0.141±0.016   |
| Benzaldehyde, 2,4,5-trimethyl-                   | 0.171±0.013   | 0.230±0.041   | 0.286±0.021   | 0.236±0.015   |
| <b>Esters</b>                                    |               |               |               |               |
| Hexanoic acid, 3-hexenyl ester, (Z)-             | 0.348±0.014   | 0.082±0.013   | 0             | 0             |
| Hexadecanoic acid, methyl ester                  | 0.084±0.009   | 0.085±0.008   | 0.118±0.015   | 0.035±0.009   |
| Sulfurous acid, dimethyl ester                   | 0             | 0.128±0.015   | 0             | 0             |
| 3-Phenylpropionic acid. 3,5-difluorophenyl ester | 0.331±0.012   | 0.326±0.027   | 0.453±0.024   | 0.347±0.018   |
| Methyl salicylate                                | 1.355±0.075   | 0.848±0.024   | 0.645±0.049   | 0.118±0.031   |
| <b>Total</b>                                     | <b>60.084</b> | <b>46.238</b> | <b>31.142</b> | <b>22.966</b> |

**Table S4. Analysis of odor activity values (OAV) and their odor characteristics of key compounds in tea leaves at a soil pH of 3.29**

| Compound            | Ci (µg/kg)  | OAVi          | %     | OAV-Splitting of Odor Characteristic |               |            |            |             |           |
|---------------------|-------------|---------------|-------|--------------------------------------|---------------|------------|------------|-------------|-----------|
|                     |             |               |       | Woody                                | Floral        | Burnt      | Green      | Fruity      | Fatty     |
| D-Limonene          | 0.432±0.021 | 11.37±0.55    | 0.70  | 1.14±0.06                            | 0             | 0          | 2.27±0.11  | 7.96±0.39   | 0         |
| α-Ionone            | 1.197±0.136 | 171.07±19.43  | 10.60 | 25.66±2.91                           | 145.41±16.51  | 0          | 0          | 0           | 0         |
| β-Cyclocitral       | 0.444±0.038 | 148.00±12.67  | 9.17  | 14.80±1.27                           | 0             | 0          | 29.60±2.53 | 103.60±8.87 | 0         |
| β- Ionone           | 1.242±0.137 | 165.66±18.27  | 10.27 | 82.83±9.13                           | 49.70±5.48    | 33.13±3.65 | 0          | 0           | 0         |
| β-Ionon-5,6-epoxide | 0.168±0.023 | 23.96±3.29    | 1.49  | 11.98±1.64                           | 7.19±0.99     | 4.79±0.66  | 0          | 0           | 0         |
| trans-Nerolidol     | 0.117±0.017 | 7.77±1.13     | 0.48  | 0                                    | 6.61±0.96     | 0          | 1.17±0.17  | 0           | 0         |
| Linalool            | 2.480±0.205 | 4.96±0.41     | 0.31  | 0                                    | 4.96±0.41     | 0          | 0          | 0           | 0         |
| Citral              | 0.249±0.026 | 7.77±0.81     | 0.48  | 0.78±0.08                            | 0             | 0          | 1.55±0.16  | 5.44±0.57   | 0         |
| Geraniol            | 3.390±0.238 | 1059.38±74.38 | 65.66 | 0                                    | 1059.38±74.38 | 0          | 0          | 0           | 0         |
| Geranylacetone      | 0.518±0.031 | 2.78±0.17     | 0.17  | 0                                    | 2.51±0.15     | 0          | 0          | 0           | 0.28±0.02 |
| 1-Octen-3-ol        | 0           | 0             | 0     | 0                                    | 0             | 0          | 0          | 0           | 0         |
| Furfural            | 1.629±0.213 | 5.78±0.76     | 0.36  | 0                                    | 0             | 4.62±0.60  | 0          | 0           | 1.16±0.15 |
| Methyl salicylate   | 0.118±0.031 | 2.96±0.77     | 0.18  | 0                                    | 2.07±0.54     | 0.89±0.23  | 0          | 0           | 0         |
| Total               | 11.984      | 1611.45       |       | 137.19                               | 1277.81       | 43.43      | 34.59      | 116.99      | 1.43      |
| %**                 |             |               |       | 8.51                                 | 79.30         | 2.70       | 2.15       | 7.26        | 0.09      |

Note: The OAV values of volatile compounds were calculated as  $OAV_i = C_i/T_i$ , where  $OAV_i$  is the OAV value of compound i,  $C_i$  is the content of compound i (µg/kg), and  $T_i$  is the threshold value of compound i (µg/kg). The total OAV value (OAV<sub>t</sub>) of tea compounds was the sum of  $OAV_i$  values of aroma active compounds, that is,  $OAV_t = \sum OAV_i$ . %\*\* is proportion of the each odor OAV accounting for OAV<sub>t</sub>.

**Table S5. Analysis of odor activity values (OAV) and their odor characteristics of key compounds in tea leaves at a soil pH of 4.13**

| Compound            | Ci (μg/kg)  | OAVi           | %     | OAV-Splitting of Odor Characteristic |                |             |            |            |           |
|---------------------|-------------|----------------|-------|--------------------------------------|----------------|-------------|------------|------------|-----------|
|                     |             |                |       | Woody                                | Floral         | Burnt       | Green      | Fruity     | Fatty     |
| D-Limonene          | 0.118±0.024 | 3.12±0.63      | 0.13  | 0.31±0.06                            | 0              | 0           | 0.62±0.13  | 2.18±0.44  | 0         |
| α-Ionone            | 1.592±0.085 | 227.39±12.14   | 9.70  | 34.11±1.82                           | 193.28±10.32   | 0           | 0          | 0          | 0         |
| β-Cyclocitral       | 0.206±0.023 | 68.67±7.67     | 2.93  | 6.87±0.77                            | 0              | 0           | 13.73±1.53 | 48.07±5.37 | 0         |
| β- Ionone           | 2.149±0.112 | 286.48± 14.93  | 12.21 | 143.24±7.47                          | 85.94±4.48     | 57.30±2.99  | 0          | 0          | 0         |
| β-Ionon-5,6-epoxide | 0.377±0.013 | 53.80±1.86     | 2.29  | 26.90±0.93                           | 16.14±0.56     | 10.760±0.37 | 0          | 0          | 0         |
| trans-Nerolidol     | 0.046±0.014 | 3.07±0.93      | 0.13  | 0                                    | 2.61±0.79      | 0           | 0.46±0.14  | 0          | 0         |
| Linalool            | 5.390±0.293 | 10.78±0.59     | 0.46  | 0                                    | 10.78±0.59     | 0           | 0          | 0          | 0         |
| Citral              | 0           | 0              | 0     | 0                                    | 0              | 0           | 0          | 0          | 0         |
| Geraniol            | 5.326±0.387 | 1664.53±120.94 | 70.80 | 0                                    | 1664.53±120.94 | 0           | 0          | 0          | 0         |
| Geranylacetone      | 0.841±0.025 | 4.52±0.13      | 0.19  | 0                                    | 4.07±0.12      | 0           | 0          | 0          | 0.45±0.01 |
| 1-Octen-3-ol        | 0           | 0              | 0     | 0                                    | 0              | 0           | 0          | 0          | 0         |
| Furfural            | 1.246±0.184 | 4.42±0.65      | 0.19  | 0                                    | 0              | 3.54±0.52   | 0          | 0          | 0.88±0.13 |
| Methyl salicylate   | 0.645±0.049 | 16.13±1.22     | 0.68  | 0                                    | 11.29±0.86     | 4.84±0.37   | 0          | 0          | 0         |
| Total               | 17.935      | 2342.90        |       | 211.43                               | 1988.64        | 76.43       | 14.82      | 50.25      | 1.34      |
| ***%                |             |                |       | 9.024                                | 84.880         | 3.262       | 0.632      | 2.145      | 0.057     |

Note: The OAV values of volatile compounds were calculated as  $OAV_i = C_i/T_i$ , where  $OAV_i$  is the OAV value of compound i,  $C_i$  is the content of compound i (μg/kg), and  $T_i$  is the threshold value of compound i (μg/kg). The total OAV value (OAVt) of tea compounds was the sum of  $OAV_i$  values of aroma active compounds, that is,  $OAV_t = \sum OAV_i$ . \*\*\* is proportion of the each odor OAV accounting for OAVt.

**Table S6. Analysis of odor activity values (OAV) and their odor characteristics of key compounds in tea leaves at a soil pH of 4.74**

| Compound            | Ci (μg/kg)  | OAVi          | %     | OAV-Splitting of Odor Characteristic |               |            |            |              |            |
|---------------------|-------------|---------------|-------|--------------------------------------|---------------|------------|------------|--------------|------------|
|                     |             |               |       | Woody                                | Floral        | Burnt      | Green      | Fruity       | Fatty      |
| D-Limonene          | 1.295±0.053 | 34.08±1.39    | 0.99  | 3.41±0.14                            | 0             | 0          | 6.82±0.28  | 23.86±0.98   | 0          |
| α-Ionone            | 1.862±0.091 | 265.95±13.00  | 7.72  | 39.89±1.95                           | 226.06±11.05  | 0          | 0          | 0            | 0          |
| β-Cyclocitral       | 0.522±0.052 | 174.16±17.33  | 5.05  | 17.42±1.73                           | 0             | 0          | 34.83±3.47 | 121.91±12.13 | 0          |
| β-Ionone            | 2.202±0.114 | 293.65±15.20  | 8.52  | 146.82±7.60                          | 88.09±4.56    | 58.73±3.04 | 0          | 0            | 0          |
| β-Ionon-5,6-epoxide | 0.177±0.026 | 25.35±3.71    | 0.74  | 12.68±1.86                           | 7.61±1.11     | 5.07±0.74  | 0          | 0            | 0          |
| trans-Nerolidol     | 0.043±0.012 | 2.88±0.80     | 0.08  | 0                                    | 2.45±0.68     | 0          | 0.43±0.12  | 0            | 0          |
| Linalool            | 8.448±0.281 | 16.90±0.56    | 0.49  | 0                                    | 16.90±0.56    | 0          | 0          | 0            | 0          |
| Citral              | 0           | 0             | 0     | 0                                    | 0             | 0          | 0          | 0            | 0          |
| Geraniol            | 8.266±0.234 | 2583.14±73.12 | 74.97 | 0                                    | 2583.14±73.12 | 0          | 0          | 0            | 0          |
| Geranylacetone      | 1.351±0.092 | 7.27±0.49     | 0.21  | 0                                    | 6.54±0.45     | 0          | 0          | 0            | 0.73±0.05  |
| 1-Octen-3-ol        | 0.644±0.046 | 16.11±1.15    | 0.47  | 0                                    | 0             | 12.89±0.92 | 1.61±0.12  | 0            | 1.61±0.012 |
| Furfural            | 1.087±0.057 | 3.86±0.20     | 0.11  | 0                                    | 0             | 3.08±0.16  | 0          | 0            | 0.77±0.04  |
| Methyl salicylate   | 0.848±0.024 | 21.20±0.60    | 0.62  | 0                                    | 14.84±0.42    | 6.36±0.18  | 0          | 0            | 0          |
| Total               | 28.228      | 3445.46       |       | 220.25                               | 2945.62       | 86.13      | 43.69      | 145.77       | 3.11       |
| ***%                |             |               |       | 6.39                                 | 85.49         | 2.50       | 1.27       | 4.23         | 0.09       |

Note: The OAV values of volatile compounds were calculated as  $OAV_i = C_i/T_i$ , where  $OAV_i$  is the OAV value of compound i,  $C_i$  is the content of compound i (μg/kg), and  $T_i$  is the threshold value of compound i (μg/kg). The total OAV value (OAV<sub>t</sub>) of tea compounds was the sum of  $OAV_i$  values of aroma active compounds, that is,  $OAV_t = \sum OAV_i$ . \*\*\* is proportion of the each odor OAV accounting for OAV<sub>t</sub>.



**Table S7. Analysis of odor activity values (OAV) and their odor characteristics of key compounds in tea leaves at a soil pH of 5.32**

| Compound            | Ci (μg/kg)   | OAVi           | %     | OAV-Splitting of Odor Characteristic |                |            |            |              |            |
|---------------------|--------------|----------------|-------|--------------------------------------|----------------|------------|------------|--------------|------------|
|                     |              |                |       | Woody                                | Floral         | Burnt      | Green      | Fruity       | Fatty      |
| D-Limonene          | 0.731±0.051  | 19.25±1.34     | 0.42  | 1.92±0.13                            | 0              | 0          | 3.85±0.27  | 13.47±0.94   | 0          |
| α-Ionone            | 2.183±0.122  | 311.88±17.43   | 6.83  | 46.78±2.61                           | 265.10±14.81   | 0          | 0          | 0            | 0          |
| β-Cyclocitral       | 0.594±0.082  | 198.09±27.33   | 4.34  | 19.81±2.73                           | 0              | 0          | 39.62±5.47 | 138.66±19.13 | 0          |
| β- Ionone           | 3.092±0.161  | 412.22±21.33   | 9.03  | 206.11±10.67                         | 123.67±6.40    | 82.44±4.27 | 0          | 0            | 0          |
| β-Ionon-5,6-epoxide | 0.126±0.022  | 17.93±3.14     | 0.39  | 8.96 ±1.57                           | 5.38±0.94      | 3.59±0.63  | 0          | 0            | 0          |
| trans-Nerolidol     | 0.045±0.011  | 2.97±0.73      | 0.07  | 0                                    | 2.52± 0.62     | 0          | 0.45±0.11  | 0            | 0          |
| Linalool            | 11.251±0.462 | 22.50±0.92     | 0.49  | 0                                    | 22.50±0.92     | 0          | 0          | 0            | 0          |
| Citral              | 0            | 0              | 0     | 0                                    | 0              | 0          | 0          | 0            | 0          |
| Geraniol            | 11.274±0.392 | 3523.06±122.50 | 77.18 | 0                                    | 3523.06±122.50 | 0          | 0          | 0            | 0          |
| Geranylacetone      | 2.990±0.123  | 16.08±0.66     | 0.35  | 0                                    | 14.47±0.60     | 0          | 0          | 0            | 1.61±0.07  |
| 1-Octen-3-ol        | 0.151±0.024  | 3.78±0.60      | 0.08  | 0                                    | 0              | 3.02±0.48  | 0.38±0.06  | 0            | 0.38± 0.06 |
| Furfural            | 0.618±0.053  | 2.19±0.19      | 0.05  | 0                                    | 0              | 1.75±0.15  | 0          | 0            | 0.44±0.04  |
| Methyl salicylate   | 1.355±0.075  | 33.87±1.88     | 0.74  | 0                                    | 23.71±1.31     | 10.16±0.56 | 0          | 0            | 0          |
| Total               | 34.410       | 4563.82        |       | 283.59                               | 3980.41        | 100.96     | 44.29      | 152.14       | 2.42       |
| ***%                |              |                |       | 6.21                                 | 87.22          | 2.21       | 0.97       | 3.33         | 0.05       |

Note: The OAV values of volatile compounds were calculated as  $OAV_i = C_i/T_i$ , where  $OAV_i$  is the OAV value of compound i,  $C_i$  is the content of compound i (μg/kg), and  $T_i$  is the threshold value of compound i (μg/kg). The total OAV value (OAV<sub>t</sub>) of tea compounds was the sum of  $OAV_i$  values of aroma active compounds, that is,  $OAV_t = \sum OAV_i$ . \*\*\* is proportion of the each odor OAV accounting for OAV<sub>t</sub>.
